# Supplementary material
Source: PubMed Central journal article supplement (PMC3159963)
Supplement: NIHMS315649-supplement-Supplementary_data.pdf [file NIHMS315649-supplement-Supplementary_data.pdf]

## Supplementary Data

Fig. 1: Real-time PCR of selected genes with altered expression in H187-63AR tumors  
Hann

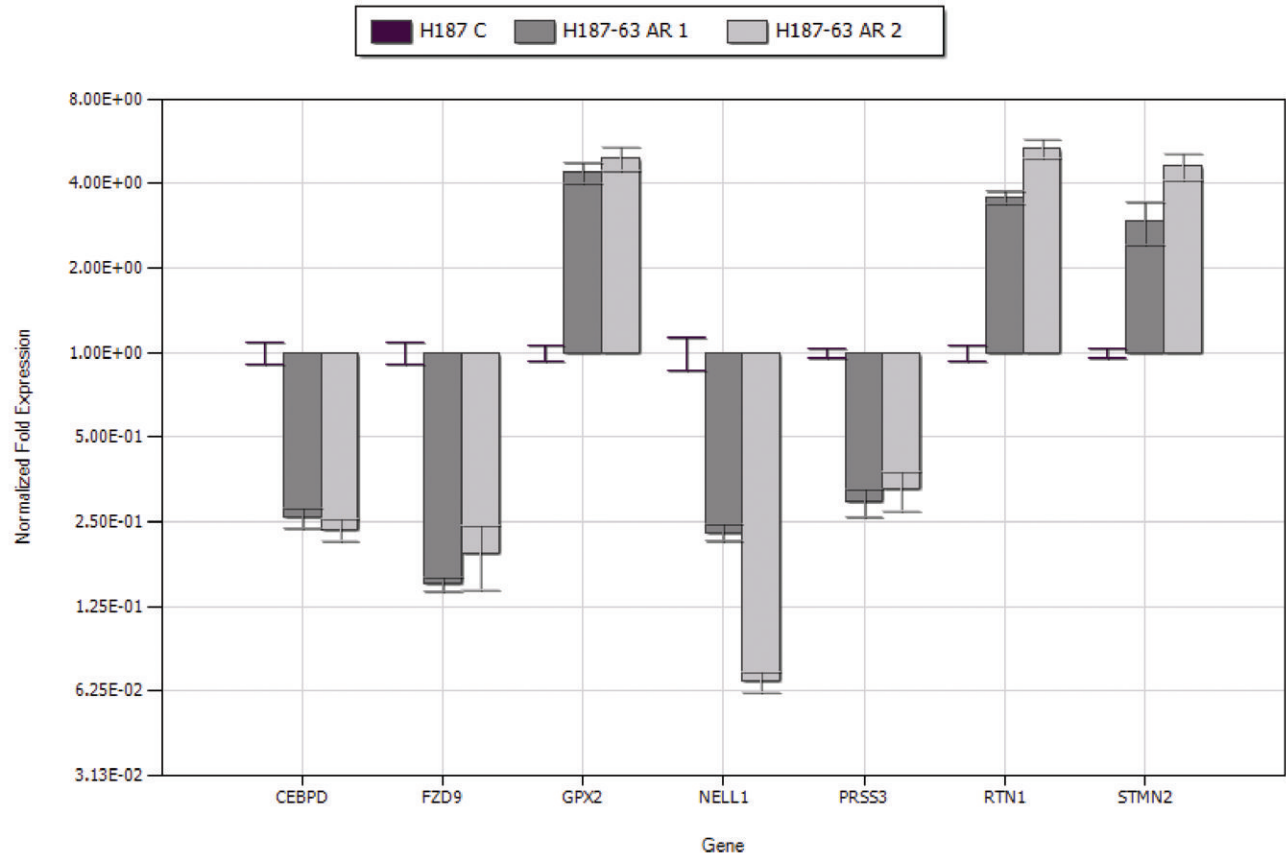

Supplementary Data Table 1  
Gene expression alterations in H187-63AR tumors  
Hann

| Increased in H187-63 AR | Fold Change | Decreased in H187-63AR | Fold Change |
|-------------------------|-------------|------------------------|-------------|
| CD81                    | 5.63        | HSPA1A                 | 0.50        |
| FSCN1                   | 5.29        | LITAF                  | 0.49        |
| SPRR2F                  | 4.75        | SNTB1                  | 0.48        |
| MXRA5                   | 4.06        | GUSBL1                 | 0.48        |
| HBA1                    | 3.98        | GSTO1                  | 0.48        |
| D4S234E                 | 3.91        | FAM84B                 | 0.48        |
| STMN2                   | 3.82        | C1orf24                | 0.48        |
| MT1F                    | 3.63        | ASS                    | 0.47        |
| GPX2                    | 3.51        | POU4F1                 | 0.47        |
| PCSK1N                  | 3.32        | SDC4                   | 0.47        |
| RTN1                    | 2.71        | MSX1                   | 0.47        |
| ZNF91                   | 2.61        | TESC                   | 0.46        |
| KCNT1                   | 2.54        | KLK12                  | 0.46        |
| ELAVL3                  | 2.50        | PPIC                   | 0.45        |
| MT1G                    | 2.47        | RASAL1                 | 0.45        |
| SST                     | 2.46        | POU4F2                 | 0.45        |
| VCX                     | 2.40        | IGFBP5                 | 0.45        |
| KCNK16                  | 2.37        | FRAS1                  | 0.44        |
| ITM2C                   | 2.36        | RHPN2                  | 0.44        |
| C10orf38                | 2.35        | BAMBI                  | 0.44        |
| HOXB9                   | 2.29        | PAM                    | 0.43        |
| NPTX2                   | 2.29        | PCK2                   | 0.42        |
| PNMA2                   | 2.25        | METTL7A                | 0.42        |
| GNG2                    | 2.25        | FOXA2                  | 0.42        |
| OLFM1                   | 2.25        | OTP                    | 0.42        |
| FLJ20647                | 2.25        | HSPB1                  | 0.42        |
| IGSF9                   | 2.24        | SH3GL2                 | 0.41        |
| TNFRSF8                 | 2.24        | IGSF21                 | 0.40        |
| EEF1A2                  | 2.20        | ATF5                   | 0.40        |
| BRSK2                   | 2.16        | ENO3                   | 0.40        |
| SCD                     | 2.14        | COMTD1                 | 0.39        |
| OLFM1                   | 2.13        | GALK1                  | 0.38        |
| PPP2R2C                 | 2.09        | NCK2                   | 0.36        |
| DCX                     | 2.07        | SYNGR4                 | 0.36        |
| ATP8B2                  | 2.06        | TRIB3                  | 0.36        |
| FLNC                    | 2.05        | MGMT                   | 0.35        |
| TAGLN2                  | 2.01        | CALML3                 | 0.34        |
|                         |             | CEBPD                  | 0.32        |
|                         |             | ASTN2                  | 0.31        |
|                         |             | DLK1                   | 0.31        |
|                         |             | POMC                   | 0.31        |
|                         |             | GRP                    | 0.27        |
|                         |             | FZD9                   | 0.26        |
|                         |             | PRSS2                  | 0.26        |
|                         |             | CEL                    | 0.19        |
|                         |             | NELL1                  | 0.18        |
|                         |             | PRSS3                  | 0.16        |
|                         |             | PRSS1                  | 0.09        |

Supplementary Data Table 2  
 Statistical analysis of LX22, LX33 and LX36 xenograft studies  
 Hann

| <b>Tumor Strain</b> | <b>Initial Volume<br/>Mean (SD)<br/>Range</b> | <b>Estimated<br/>Growth Rate<br/>per day</b> | <b>Percent<br/>Increase</b> | <b>P-value</b> |
|---------------------|-----------------------------------------------|----------------------------------------------|-----------------------------|----------------|
| <b>LX33</b>         |                                               |                                              |                             |                |
| Control (5)         | 138.5 (17.07)<br>112.8-159.4                  | 1.1322                                       | 13.22%                      | 0.1365         |
| Etoposide (4)       | 142.5 (10.59)<br>128.6-152.8                  | 1.1229                                       | 12.29%                      |                |
| ABT (4)             | 139.5 (10.13)<br>124.9-147.9                  | 1.1252                                       | 12.52%                      |                |
| <b>LX22</b>         |                                               |                                              |                             |                |
| Control (5)         | 154.3 (23.33)<br>132.9-191.1                  | 1.1277                                       | 12.77%                      | 0.0002         |
| Etoposide (5)       | 136.0 (9.25)<br>126.2-145.9                   | 1.1094                                       | 10.94%                      |                |
| ABT (6)             | 148.6 (18.31)<br>125-180.6                    | 1.1162                                       | 11.62%                      |                |
| Combo (5)           | 134.8 (8.27)<br>121.1-142.7                   | 1.0854                                       | 8.54%                       |                |
| <b>LX36</b>         |                                               |                                              |                             |                |
| Control(5)          | 188.2 (37.84)<br>124.9-220.0                  | 1.1296                                       | 12.96%                      | 0.0328         |
| Etoposide (5)       | 138.9 (12.65)<br>119.2-153.0                  | 1.1422                                       | 14.22%                      |                |
| ABT (5)             | 156.6 (16.67)<br>137.9-178.7                  | 1.1327                                       | 13.27%                      |                |
| Combo (5)           | 142.6 (22.62)<br>115.2-176.4                  | 1.1138                                       | 11.38%                      |                |
